# Supplementary material
Source: PubMed Central journal article supplement (PMC7890463)
Supplement: NIHMS1666281-supplement-1.pdf [file NIHMS1666281-supplement-1.pdf]

## Supplementary Material

Table S1: Distribution of number of scans per subject

| number of scans per subject | 1    | 2  | 3  | 4 | 5 | 6 | 7 |
|-----------------------------|------|----|----|---|---|---|---|
| number of subjects          | 2598 | 59 | 19 | 6 | 6 | 3 | 1 |

Table S2: Dataset information

| Dataset      | Full project name                                                          | Source                                                                                                                                                              |
|--------------|----------------------------------------------------------------------------|---------------------------------------------------------------------------------------------------------------------------------------------------------------------|
| ADNI         | Alzheimer's Disease Neuroimaging Initiative                                | <a href="http://adni.loni.usc.edu">http://adni.loni.usc.edu</a>                                                                                                     |
| AIBL         | Australian Imaging Biomarkers and Lifestyle Study of Ageing                | <a href="https://aibl.csiro.au">https://aibl.csiro.au</a>                                                                                                           |
| NIFD         | Frontotemporal Lobar Degeneration Neuroimaging Initiative                  | <a href="https://ida.loni.usc.edu/login.jsp?project=NIFD">https://ida.loni.usc.edu/login.jsp?project=NIFD</a>                                                       |
| IXI          | Information eXtraction from Images                                         | <a href="https://brain-development.org/ixi-dataset">https://brain-development.org/ixi-dataset</a>                                                                   |
| BGSP         | Brain Genomics Superstruct Project                                         | <a href="https://dataverse.harvard.edu/dataverse/BGSP">https://dataverse.harvard.edu/dataverse/BGSP</a>                                                             |
| Cam-CAN      | Cambridge Centre for Ageing and Neuroscience                               | <a href="http://www.cam-can.org">http://www.cam-can.org</a>                                                                                                         |
| OASIS-1      | Open Access Series of Imaging Studies-1                                    | <a href="https://www.oasis-brains.org">https://www.oasis-brains.org</a>                                                                                             |
| OASIS-2      | Open Access Series of Imaging Studies-2                                    | <a href="https://www.oasis-brains.org">https://www.oasis-brains.org</a>                                                                                             |
| SALD         | Southwest University Adult life-span Dataset                               | <a href="http://fcon_1000.projects.nitrc.org/indi/retro/sald.html">http://fcon_1000.projects.nitrc.org/indi/retro/sald.html</a>                                     |
| SLIM         | Southwest University Longitudinal Imaging Multimodal Brain Data Repository | <a href="http://fcon_1000.projects.nitrc.org/indi/retro/southwestuni_qiu_index.html">http://fcon_1000.projects.nitrc.org/indi/retro/southwestuni_qiu_index.html</a> |
| PPMI         | Parkinson's Progression Markers Initiative                                 | <a href="https://www.ppmi-info.org/">https://www.ppmi-info.org/</a>                                                                                                 |
| SchizConnect | SchizConnect                                                               | <a href="http://schizconnect.org/">http://schizconnect.org/</a>                                                                                                     |
| DLBS         | Dallas life-span Brain Study                                               | <a href="http://fcon_1000.projects.nitrc.org/indi/retro/dlbs.html">http://fcon_1000.projects.nitrc.org/indi/retro/dlbs.html</a>                                     |
| CoRR         | Consortium for Reliability and Reproducibility                             | <a href="http://fcon_1000.projects.nitrc.org/indi/CoRR/html/">http://fcon_1000.projects.nitrc.org/indi/CoRR/html/</a>                                               |
